# Supplementary material for: MCM41 functionalized with ethylenediaminetriacetic acid for ion-exchange chromatography
Source: Royal Society of Chemistry journal article supplement (doi:10.1039/c0jm02291h), 2010-10-21
Supplement: c0jm02291h.pdf [file c0jm02291h.pdf]

## Supplementary Information

### Scanning Electron Microscopy (SEM)

SEM micrograph of ED3A-MCM41 (FEI QUANTA INSPECT 200 LV) shows spherical particles having size smaller than 1  $\mu\text{m}$ .

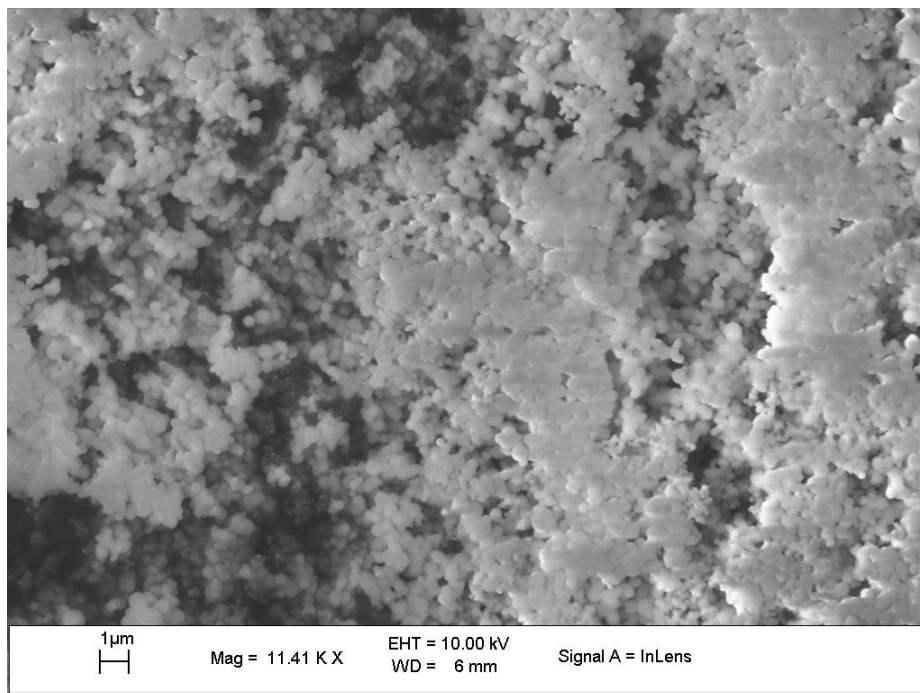

Fig S1 Scanning Electron Microscopy image of ED3A-MCM41
